# Supplementary material for: Diets that differ in their FODMAP content alter the colonic luminal microenvironment
Source: HighWire-hosted journal article supplement (doi:10.1136/gutjnl-2014-307264), 2014-07-12
Supplement: gutjnl-2014-307264supp1.pdf [file gutjnl-2014-307264supp1.pdf]

Supplement 1. Methodology of the primers and optimised quantitative real-time PCR (QPCR) conditions applied to faecal samples of participants after follow a their habitual diets and provided low FODMAP and typical Australian diets.

All QPCR was performed in triplicate on a CFX 384<sup>TM</sup> real-time PCR Detection System (Bio-Rad, CA, USA) in a total volume of 10  $\mu$ L. Each reaction consisted of 3  $\mu$ L (1 ng/ $\mu$ L) DNA template and 7  $\mu$ L of PCR mixture containing 5  $\mu$ L SsoFast<sup>™</sup> EvaGreen<sup>®</sup> Supermix, 0.5  $\mu$ L bovine serum albumin, forward and reverse primers, and PCR-grade water (Sigma-Aldrich, MO, USA). The QPCR cycling conditions were: hot-start 98 °C for 3 min followed by 35 cycles of two-step QPCR with denaturing at 98 °C for 15 s and annealing/elongation time and temperature as in the Table. This was followed by fluorescence acquisition after each cycle. A final melt-curve analysis was performed after completion of all cycles with fluorescence acquired at 0.5 °C intervals between 55 and 95 °C to verify specificity of amplification. An eight-series of 10-fold dilutions of a sample derived standard containing the target amplicon was analysed in parallel with DNA samples for estimation of PCR efficiency and absolute abundance. Data were analysed with Bio-Rad CFX Manager software (Version 2.1) for absolute abundances<sup>1</sup>. Data were presented as absolute abundance and as a proportion of total bacteria.

Table. Real-time PCR primers used and their amplification conditions.

| Target                          | Primers                  | Sequence (5'-3')                                   | Conc. (nM) | Annealing |             | Reference       |
|---------------------------------|--------------------------|----------------------------------------------------|------------|-----------|-------------|-----------------|
|                                 |                          |                                                    |            | Temp (°C) | Time (Sec.) |                 |
| Total bacteria                  | UnivF<br>UnivR           | TCCTACGGGAGGCAGCAGT<br>GGACTACCAGGGTATCTATCCTGTT   | 500        | 60        | 45          | <sup>2</sup>    |
| <i>Clostridium</i> cluster IV   | sg-Clept-F<br>sg-Clept-R | CTTTGAGTTTCATTCTTGCGAA<br>GCACAAGCAGTGGAGT         | 500        | 56        | 20          | <sup>3</sup>    |
| <i>F. prausnitzii</i>           | FPR-1F<br>FPR-2R         | AGATGGCCTCGCGTCCGA<br>CCGAAGACCTTCTTCCTCC          | 500        | 60        | 20          | <sup>4</sup>    |
| <i>Clostridium</i> cluster XIVa | g-Ccoc-F<br>g-Ccoc-R     | AAATGACGGTACCTGACTAA<br>CTTTGAGTTTCATTCTTGCGA A    | 500        | 60        | 20          | <sup>3</sup>    |
| <i>Roseburia</i> spp.           | RosF<br>RosR             | TACTGCATTGGAAACTGTCTG<br>CGGCACCGAAGAGCAAT         | 700        | 58        | 45          | <sup>5</sup>    |
| <i>Lactobacilli</i> group       | Lacto-F<br>Lacto-R       | AGCAGTAGGGAATCTTCCA<br>CACCGCTACACATGGAG           | 600        | 56        | 20          | <sup>6, 7</sup> |
| <i>Bifidobacterium</i> spp.     | Bif-F<br>Bif-R           | TCGCGTC(C/T)GGTGTGAAAG<br>CCACATCCAGC(A/G)TCCAC    | 600        | 56        | 20          | <sup>8</sup>    |
| <i>A. muciniphila</i>           | AM1<br>AM2               | CAGCACGTGAAGGTGGGGAC<br>CCTTGCGGTTGGCTTCAGAT       | 350        | 63        | 30          | <sup>9</sup>    |
| <i>R. gnavus</i>                | RgnaF<br>RgnaR           | GGACTGCATTTGGAAGTGTCTG<br>AACGTCAGTCATCGTCCAGAAAAG | 500        | 58        | 20          | <sup>10</sup>   |

|                   |                |                                                  |     |    |    |               |
|-------------------|----------------|--------------------------------------------------|-----|----|----|---------------|
| <i>R. torques</i> | RtorF<br>RtorR | GCTTAGATTCTTCGGATGAAGAGGA<br>AGTTTTTACCCCCGCACCA | 500 | 58 | 40 | <sup>10</sup> |
|-------------------|----------------|--------------------------------------------------|-----|----|----|---------------|

Microbial diversity of the *Clostridium* cluster XIVa, which includes a large number of mainly butyrate-producing bacteria, was determined by denaturing gradient gel electrophoresis (DGGE) using the INGENYphorU-2 gel electrophoresis system (Ingeny International, NL, USA) according to the manufacturer's method for perpendicular gels. These analyses were carried out using *Clostridium* cluster XIVa-specific primers, Erec688F and Erec841R-GC, as previously described<sup>11</sup>. Briefly, bacterial PCR products were separated on a gel with a 40-65% denaturing gradient and 6% acrylamide. Gels were loaded with 15 µl of PCR product and run at 110V for 16 h at 60 °C. They were then cooled and stained for 30 min using 10 µl of 1x Sybr-gold nucleic acid stain (Molecular Probes, Eugene, USA). Gels were de-stained in 100 mL of MilliQ water and digitally photographed using a Dark Reader transilluminator (DR195M, Clare Chemical Research, USA) equipped with a DigiDoc System (Bio-Rad Laboratories, CA, USA) with an attached Syber-gold filter. The DGGE banding patterns for each specimen were analysed using the GelCompar II version 6.5 (Applied Maths Inc., Texas, USA) software package by normalised and standardised all gels using four DGGE standards run on every gel. The total banding intensities were standardised between lanes and individual band intensities were expressed as a fraction of total peak height for that sample. The Shannon index<sup>12</sup> was calculated for each DGGE profile, also taking into account relative band intensities, to estimate bacterial diversity.

Lactate and succinate were measured as previously published<sup>13</sup>. Briefly, lactate and succinate were measured in duplicate digesta samples by L-lactate and succinic acid kits from Megazyme (Ireland, UK). Digesta samples of approximately 0.5 g were diluted three fold in distilled water, mixed thoroughly and centrifuged at 2,000 g for 10 min. The samples were then clarified by mixing 500 µL of supernatant with 300 µL water, 50 µL of each Carrez solution and 100 µL NaOH. The mixed solution was then filtered using a 0.45 µm syringe filter. The lactate and succinate assays were then conducted separately in 96 well plates following the kit instructions. Lactate and succinate concentration was determined using a spectrophotometer (SpectroMax, Molecular Devices Corporation, Sunnyvale, CA) at an absorbance of 340 nm. The data are reported as g per 100 g and the lower detection limit is 0.016 g/100g.

## References:

1. Vandesompele J, De Preter K, Pattyn F, et al. Accurate normalization of real-time quantitative RT-PCR data by geometric averaging of multiple internal control genes. *Genome Biol.* 2002;3(7).
2. Nadkarni MA, Martin FE, Jacques NA, et al. Determination of bacterial load by real-time PCR using a broad-range (universal) probe and primers set. *Microbiol.* 2002;148(1):257-66.
3. Matsuki T, Watanabe K, Fujimoto J, et al. Use of 16S rRNA Gene-Targeted Group-Specific Primers for Real-Time PCR Analysis of Predominant Bacteria in Human Feces. *Appl Environ Microbiol.* 2004;70(12):7220-28.
4. Wang RF, Cao WW, Cerniglia CE. Phylogenetic analysis of *Fusobacterium prausnitzii* based upon the 16S rRNA gene sequence and PCR confirmation. *Int J Syst Bacteriol.* 1996;46(1):341-3.
5. Larsen N, Vogensen FK, van den Berg FW, et al. Gut Microbiota in Human Adults with Type 2 Diabetes Differs from Non-Diabetic Adults. *PLoS ONE.* 2010;5(2):e9085.
6. Heilig HG, Zoetendal EG, Vaughan EE, et al. Molecular diversity of *Lactobacillus* spp. and other lactic acid bacteria in the human intestine as determined by specific amplification of 16S ribosomal DNA. *Appl Environ Microbiol.* 2002;68(1):114-23.
7. Walter J, Hertel C, Tannock GW, et al. Detection of *Lactobacillus*, *Pediococcus*, *Leuconostoc*, and *Weissella* species in human feces by using group-specific PCR primers and denaturing gradient gel electrophoresis. *Appl Environ Microbiol.* 2001;67(6):2578-85.
8. Rinttilä T, Kassinen A, Malinen E, et al. Development of an extensive set of 16S rDNA-targeted primers for quantification of pathogenic and indigenous bacteria in faecal samples by real-time PCR. *J Appl Microbiol.* 2004;97(6):1166-77.
9. Collado MC, Derrien M, Isolauri E, et al. Intestinal integrity and *Akkermansia muciniphila*, a mucin-degrading member of the intestinal microbiota present in infants, adults, and the elderly. *Appl Environ Microbiol.* 2007;73(23):7767-70.
10. Png C, Linden S, Gilshenan K, et al. Mucolytic bacteria with increased prevalence in IBD mucosa augment in vitro utilization of mucin by other bacteria. *Am J Gastroenterol.* 2010;105(11):2420-8.
11. Vanhoutte T, De Preter V, De Brandt E, et al. Molecular monitoring of the fecal microbiota of healthy human subjects during administration of lactulose and *Saccharomyces boulardii*. *Appl Environ Microbiol.* 2006;72(9):5990-7.
12. Shannon CE, Weaver W. The Mathematical Theory of Communication. *Bell Syst Tech J.* 1949;27(3):379-423.
13. Belobrajdic DP, Jenkins CL, Bushell R, et al. Fructan extracts from wheat stem and barley grain stimulate large bowel fermentation in rats. *Nutr Res.* 2012;32(8):599-606.
