# Supplementary material for: Diets that differ in their FODMAP content alter the colonic luminal microenvironment
Source: HighWire-hosted journal article supplement (doi:10.1136/gutjnl-2014-307264), 2014-07-12
Supplement: gutjnl-2014-307264supp3.pdf [file gutjnl-2014-307264supp3.pdf]

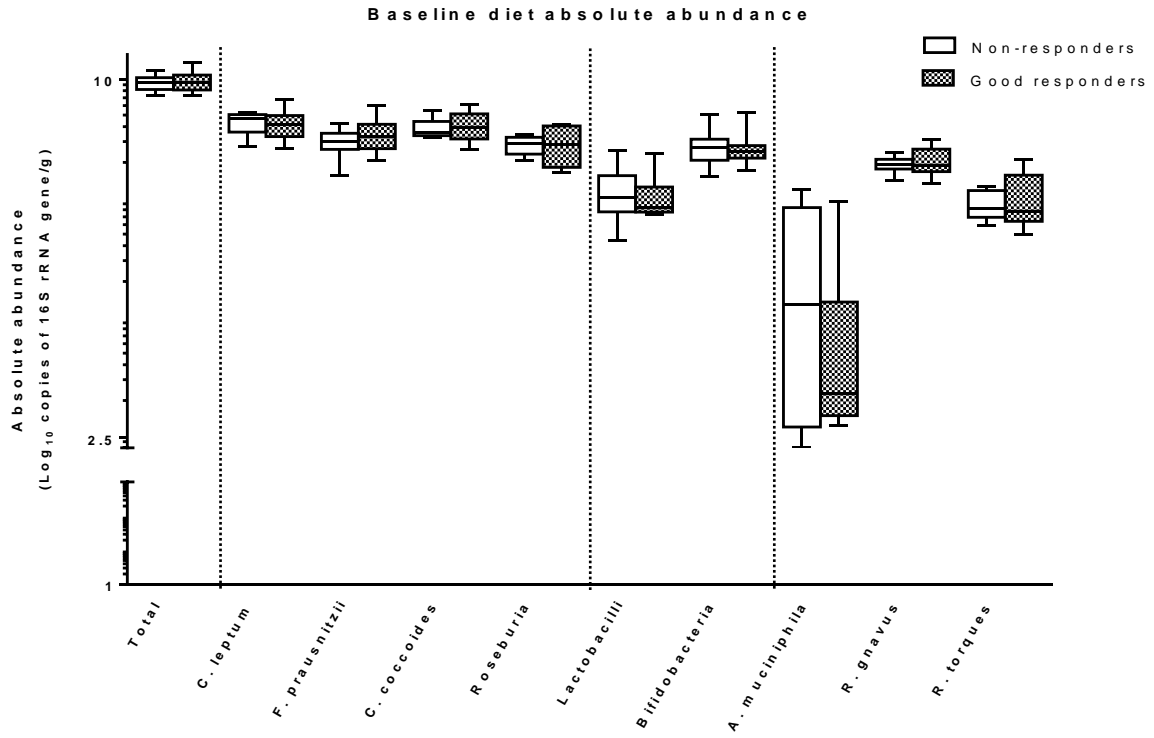

a

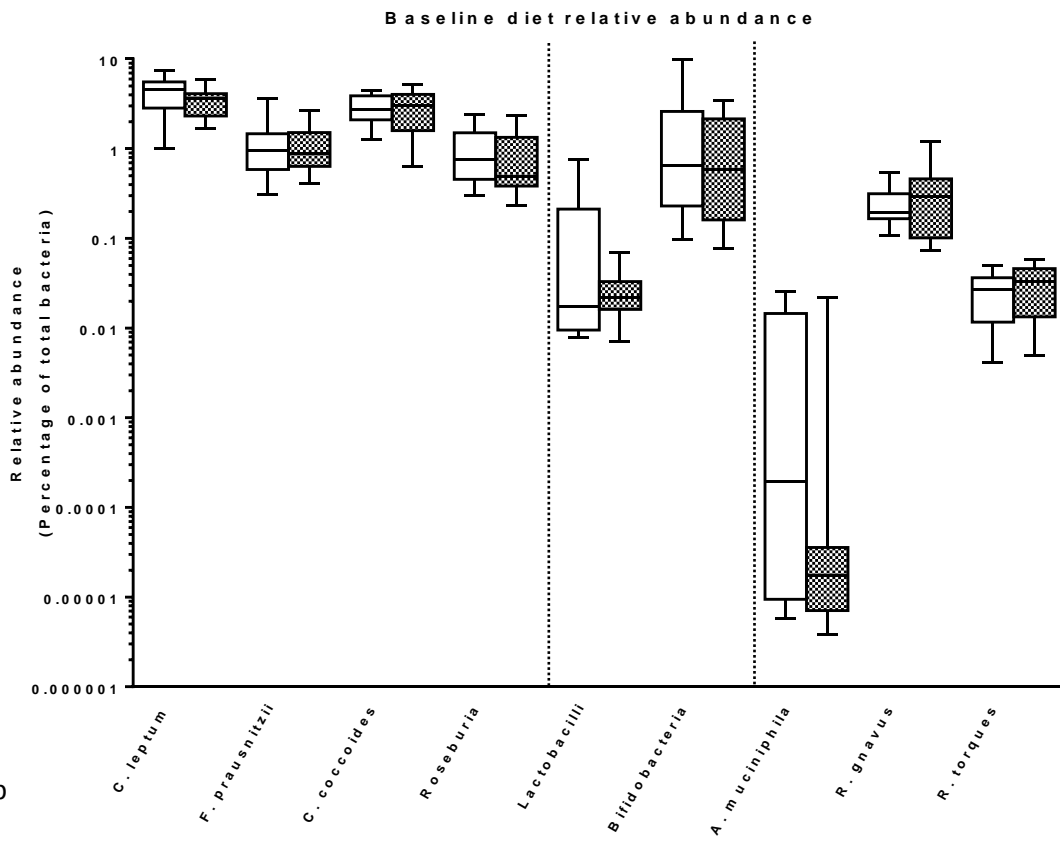

b

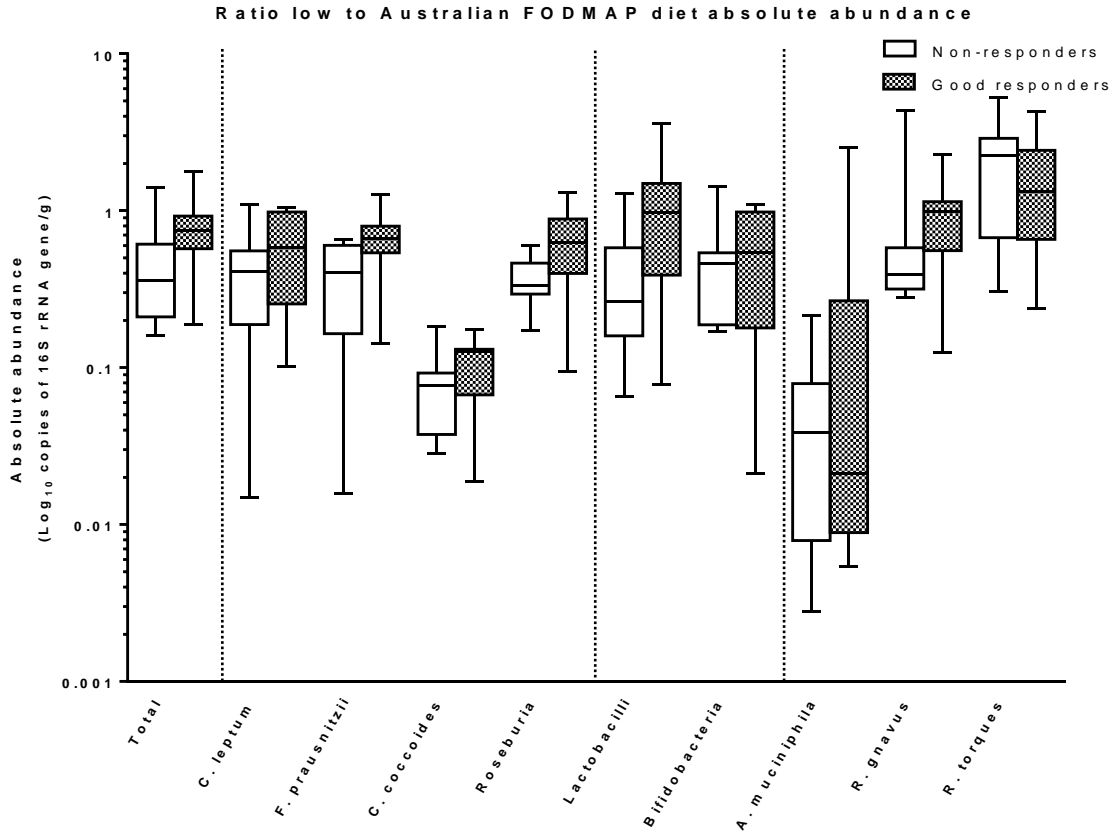

C

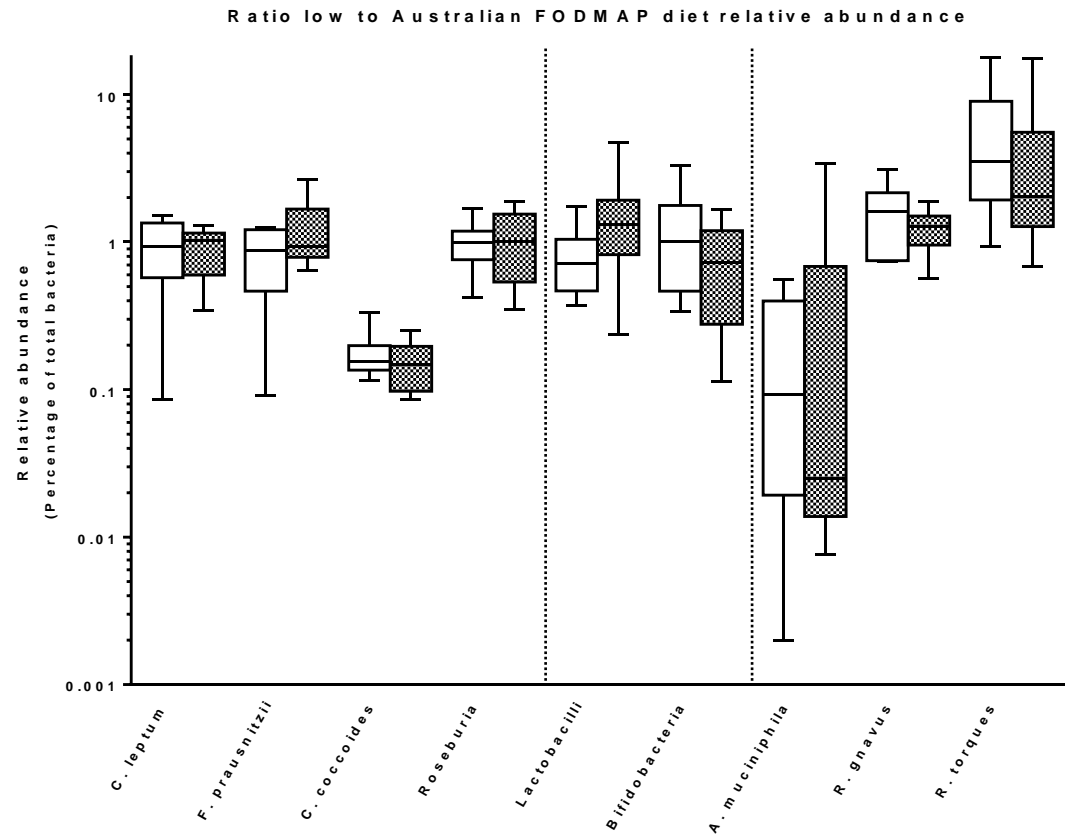

d

Supplement 3. Bacterial abundance of subjects with IBS categorised as non-responders and good responders based on mean overall gastrointestinal symptom scores over the last 14 days of each interventional diet measured by 100 mm visual analogue scale<sup>6</sup>. Non-responders were classified as less than 10 mm symptom score on low FODMAP diet below the typical Australian diet (n = 9) and good responders were arbitrarily defined as greater than 20 mm symptom score while on low FODMAP below the typical Australian diet (n = 11). Data are presented as absolute and relative bacterial abundance during baseline diet (a and b respectively) and change of absolute and relative abundance on provided low FODMAP and typical Australian diets (c and d respectively). There were no differences in bacterial abundance between non-responders and good responders (Mann-Whitney test with Bonferroni correction;  $P \leq 0.005$  absolute and  $P \leq 0.006$  relative bacterial abundance).
